# Supplementary material for: Official Documents- Disbursement Letter for GEF Grant TF013706
Source: Springer Nature journal article supplement (doi:10.1038/s41467-024-47416-z), 2013-01-29
Supplement: 41467_2024_47416_MOESM1_ESM.pdf [file 41467_2024_47416_MOESM1_ESM.pdf]

## Supplementary Information

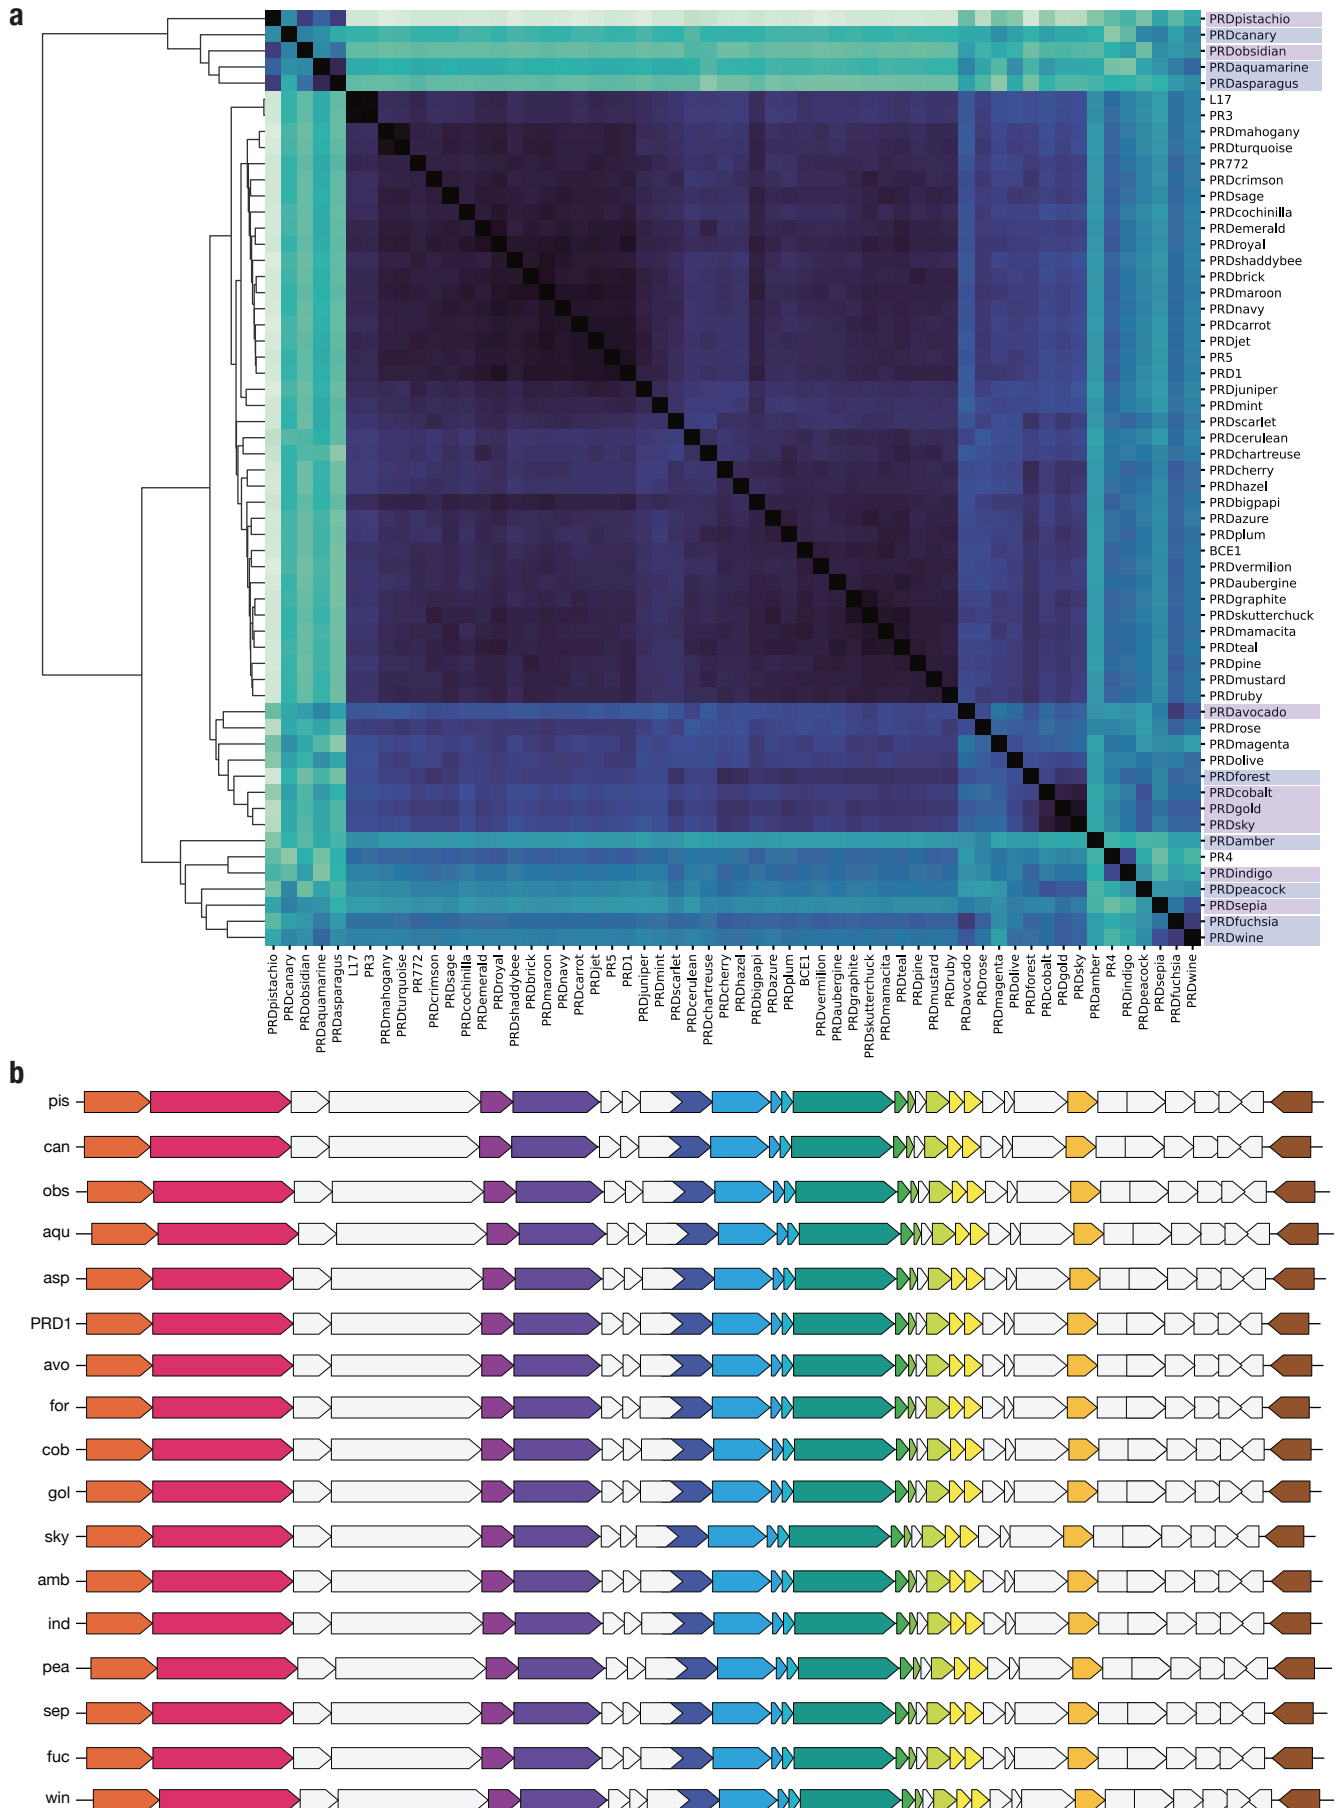

**Figure S1 | Pairwise nucleotide identity and gene synteny of alphatectiviruses** **a**, Whole-genome pairwise nucleotide identity matrix comparing all known alphatectiviruses. Highlighted isolates represent proposed new species. **b**, Gene map comparison of representative alphatectiviruses isolated in this study, colors are as in (Figure S6b). Chosen isolates are those that meet species demarcation criteria according to current guidelines by the International Committee on Taxonomy of Viruses (ICTV) (<95% average nucleotide identity).

**a**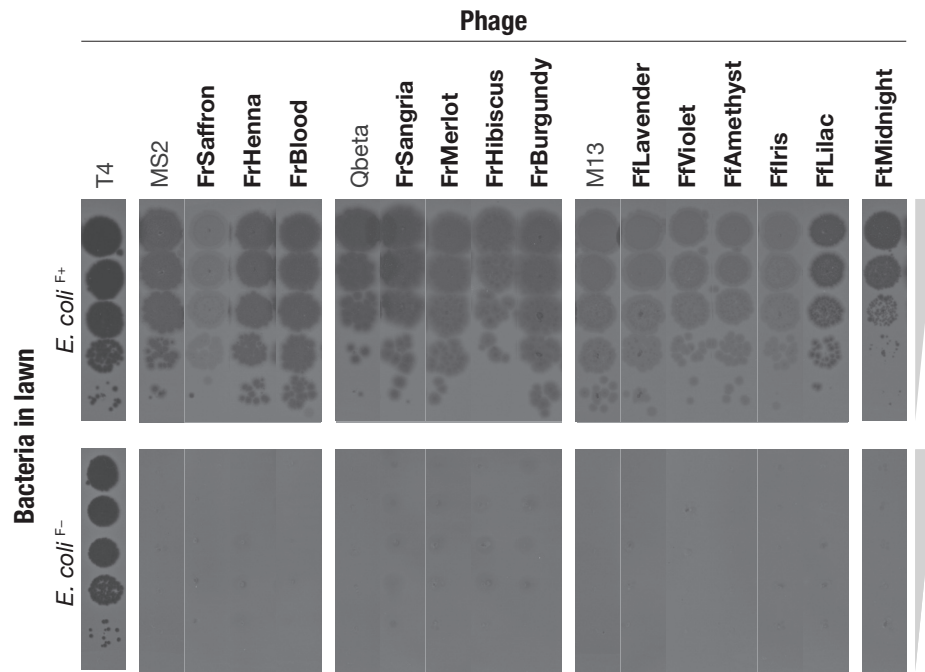**b**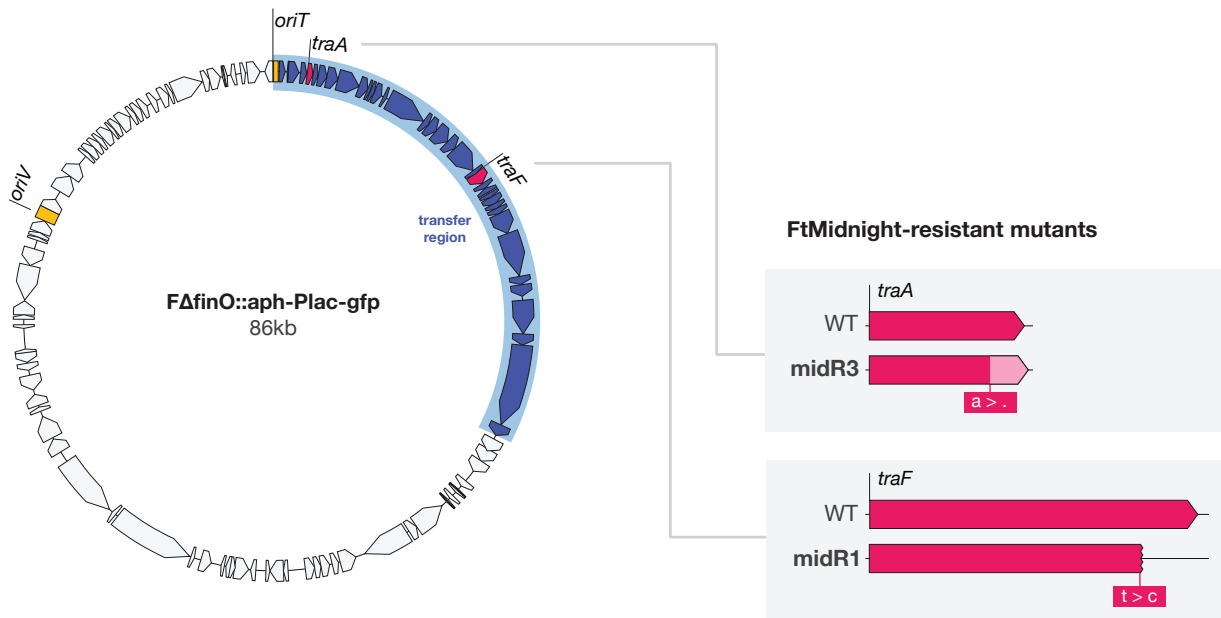**c**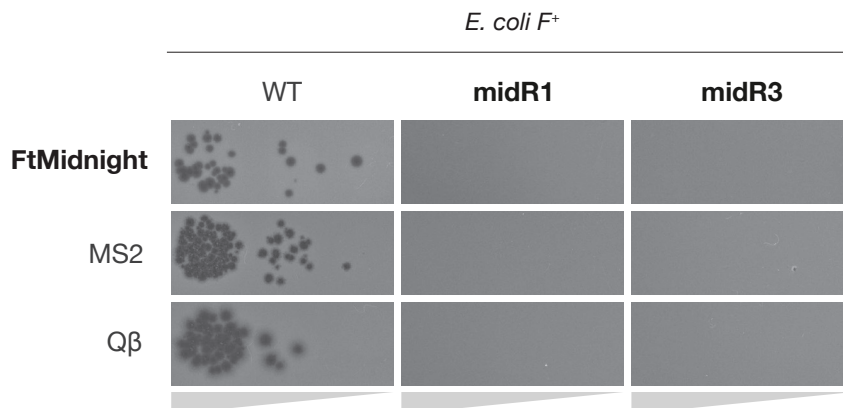

**Figure S2 | Evidence that FtMidnight uses the F pilus as a receptor** **a**, Confirmatory plaque assay of all newly isolated F-dependent phages on *E. coli* MG1655 hosts with and without the F plasmid, confirming plasmid dependency. The F plasmid derivative F $\Delta$ finO::aph-Plac-gfp is used throughout this work (Methods). *E. coli* phage T4, which is not plasmid-dependent, is included as a control **b**, Mutations conferring resistance to FtMidnight map to the transfer region of the F plasmid. Independently, mutant midR3 has a 1 bp deletion that causes a frameshift in the C-terminal domain of TraA, the major pilin, resulting in missense amino acid sequence at the C-terminus of the protein. Mutant midR1 has a substitution that causes a premature truncation of protein TraF, which is an outer-membrane component of the plasmid transfer machinery. Both proteins are required for pilus assembly and plasmid transfer, suggesting that FtMidnight interacts directly with the conjugative pilus. **c**, F plasmid mutations that confer resistance to FtMidnight (midR1 and midR3) confer collateral resistance to F plasmid dependent phages MS2 and Qbeta.

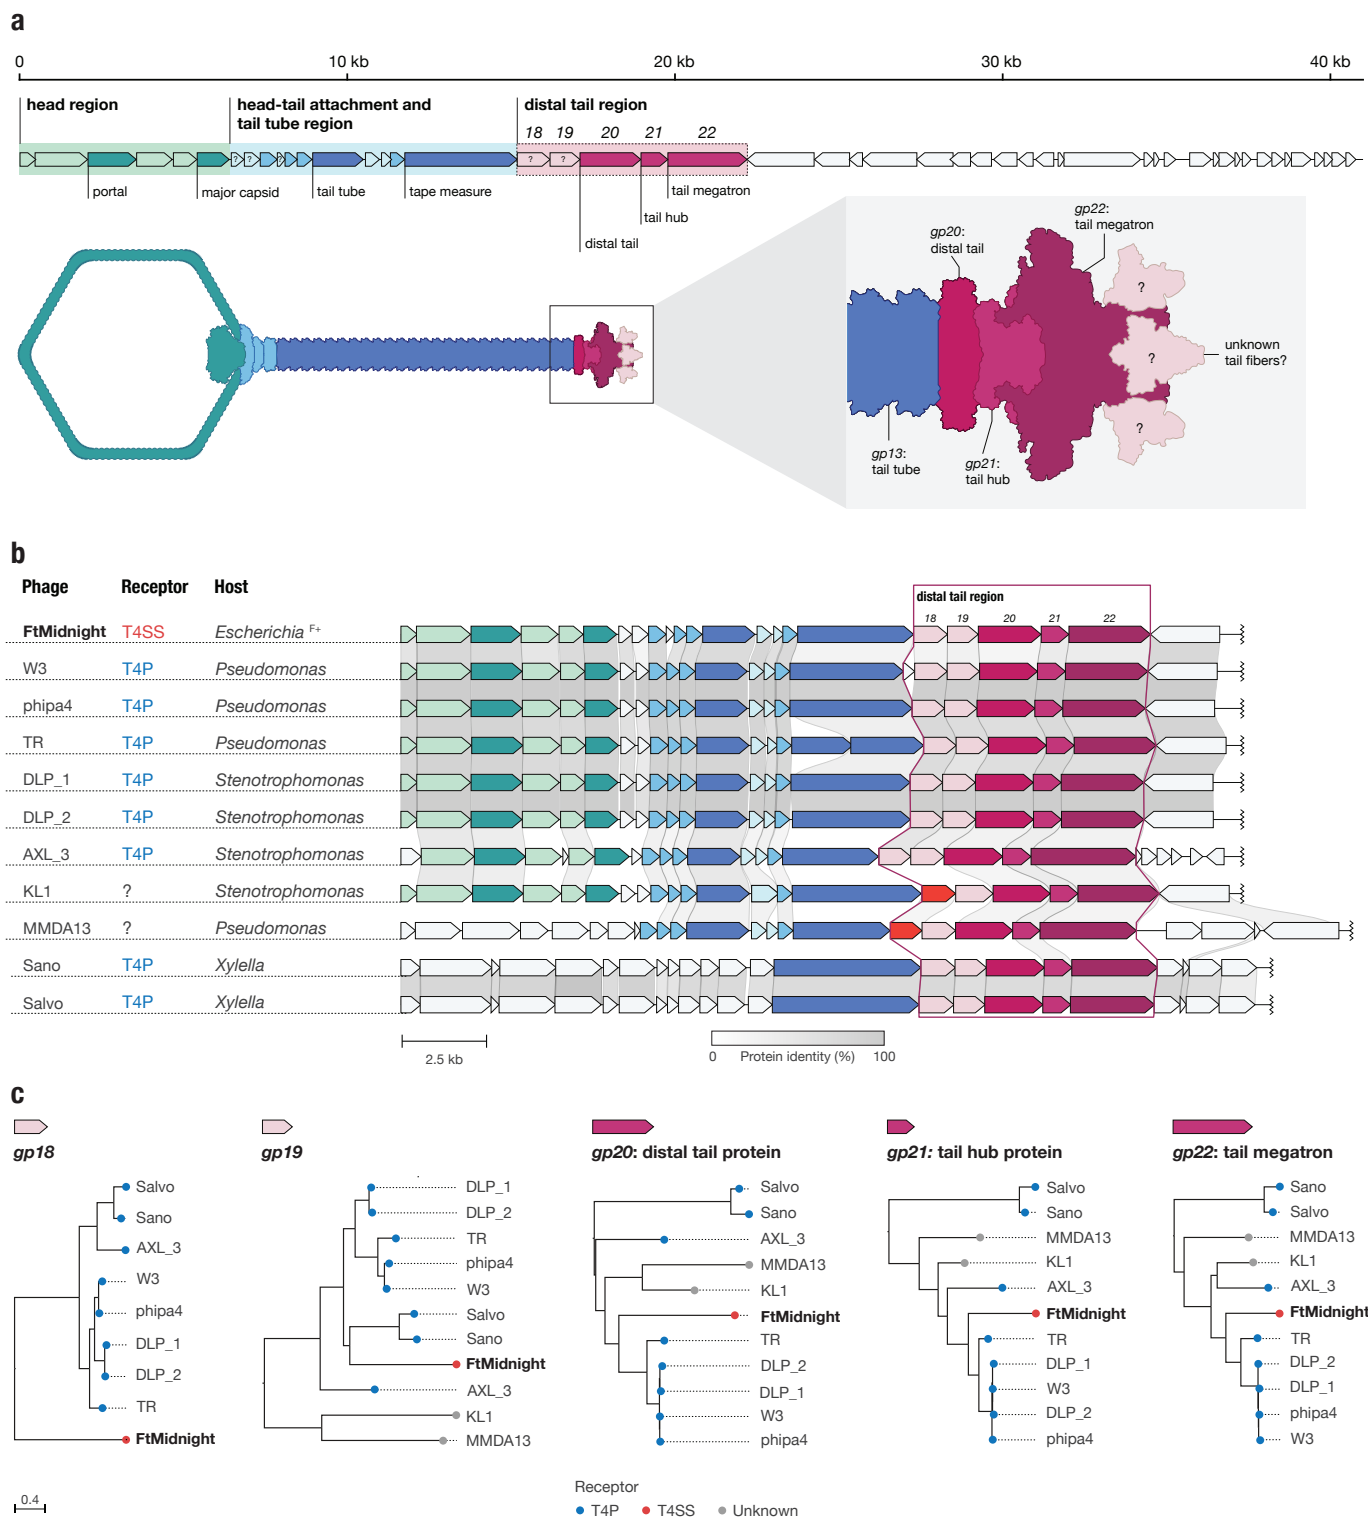

**Figure S3 | The distal tail of FtMidnight is related to phages that use the orthogonal type 4 pilus as a receptor** **a**, Gene map and structural model of FtMidnight. The model was constructed through annotation with the PHROGs database, and refined with structure-guided homology matches to PDB structures using HHpred (Methods). The predicted head formation region is highlighted in green, the predicted head-tail attachment and tail tube region is highlighted in blue, and the genes predicted to be involved in the distal tail formation (gp18-22) are highlighted in pink. The distal tail region is presumed to interact with the receptor in the bacterial cell surface. Genes of unknown function within those regions are marked with a question mark. In the distal tail region, genes gp20-gp22 match components of the PDB structure 8GTC, which is the distal tail region of the marine siphophage vB\_DshS-R4C. (See Supplementary Dataset 2). Homologs to the tail fiber in vB\_DshS-R4C were not identified. **b**, Comparison of phage genomes containing homologs of gp18-gp22. Homologous genes are color-coded and aligned, and the connector shade corresponds to protein identity. Distal tail region is framed to show conservation of the region. All phages have perfectly conserved gp18-22, except KL1 and MMDA13, which have a distinct gene, shown in orange, in place of gp18. Host of isolation and characterized phage receptor is shown on the left. While FtMidnight uses a type 4 secretion system (T4SS), as a receptor (the F-pilus structure, in particular), the rest of the characterized phages shown use the type 4 pilus (T4P). The receptor was annotated if found in the literature. Accessions and references can be found in Supplementary Dataset 2. **c**, Phylogenetic trees of individual proteins of the distal tail region from the phage genomes shown in (b). Leaves in the trees are colored based on the known receptor for the phage of origin. gp18 appears to be the most divergent of the distal tail region proteins from homologs in T4P-associated phages, suggesting it might be responsible for the difference in receptor specificity.

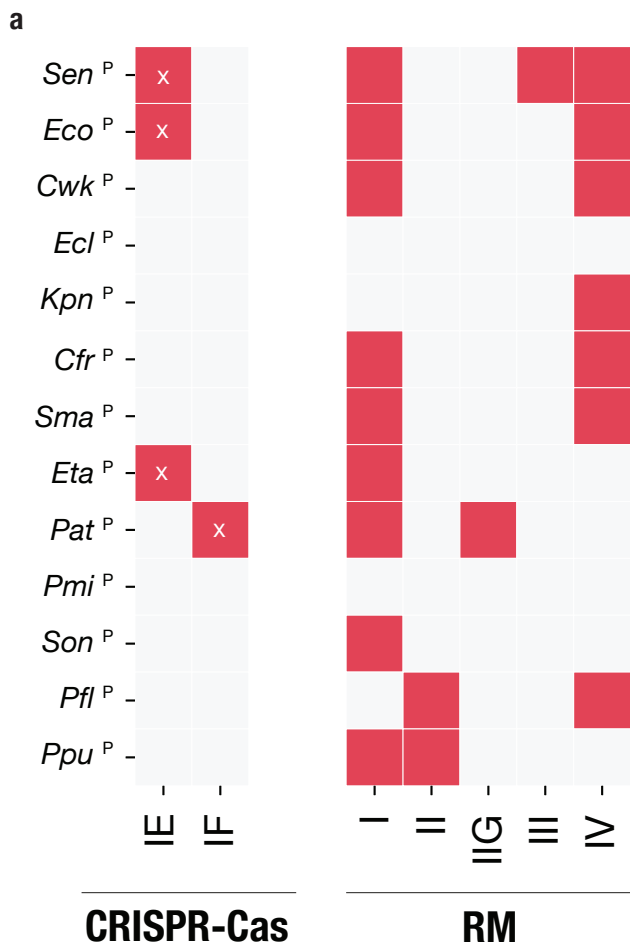

**Figure S4 | Presence of sequence-specific phage defense systems in the genomes of host bacteria used in this study** **a**, Heatmap indicating presence or absence of CRISPR-Cas and restriction modification (RM) systems in the genomes of bacterial hosts used in this study, as detected by CRISPRCasTyper and DefenseFinder (Methods). Red indicates presence, and gray indicates absence of each specific subtype. Where hosts were found to contain CRISPR-Cas systems, the sequence of each spacer was queried against the sequence of all the phages in our collection to detect putative targeting events. A cross indicates that no spacers in the CRISPR arrays matched any of the plasmid-dependent tectiviruses in our collection. (Supplementary Dataset 3)

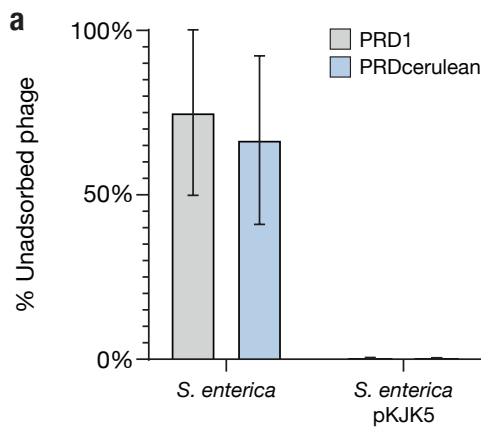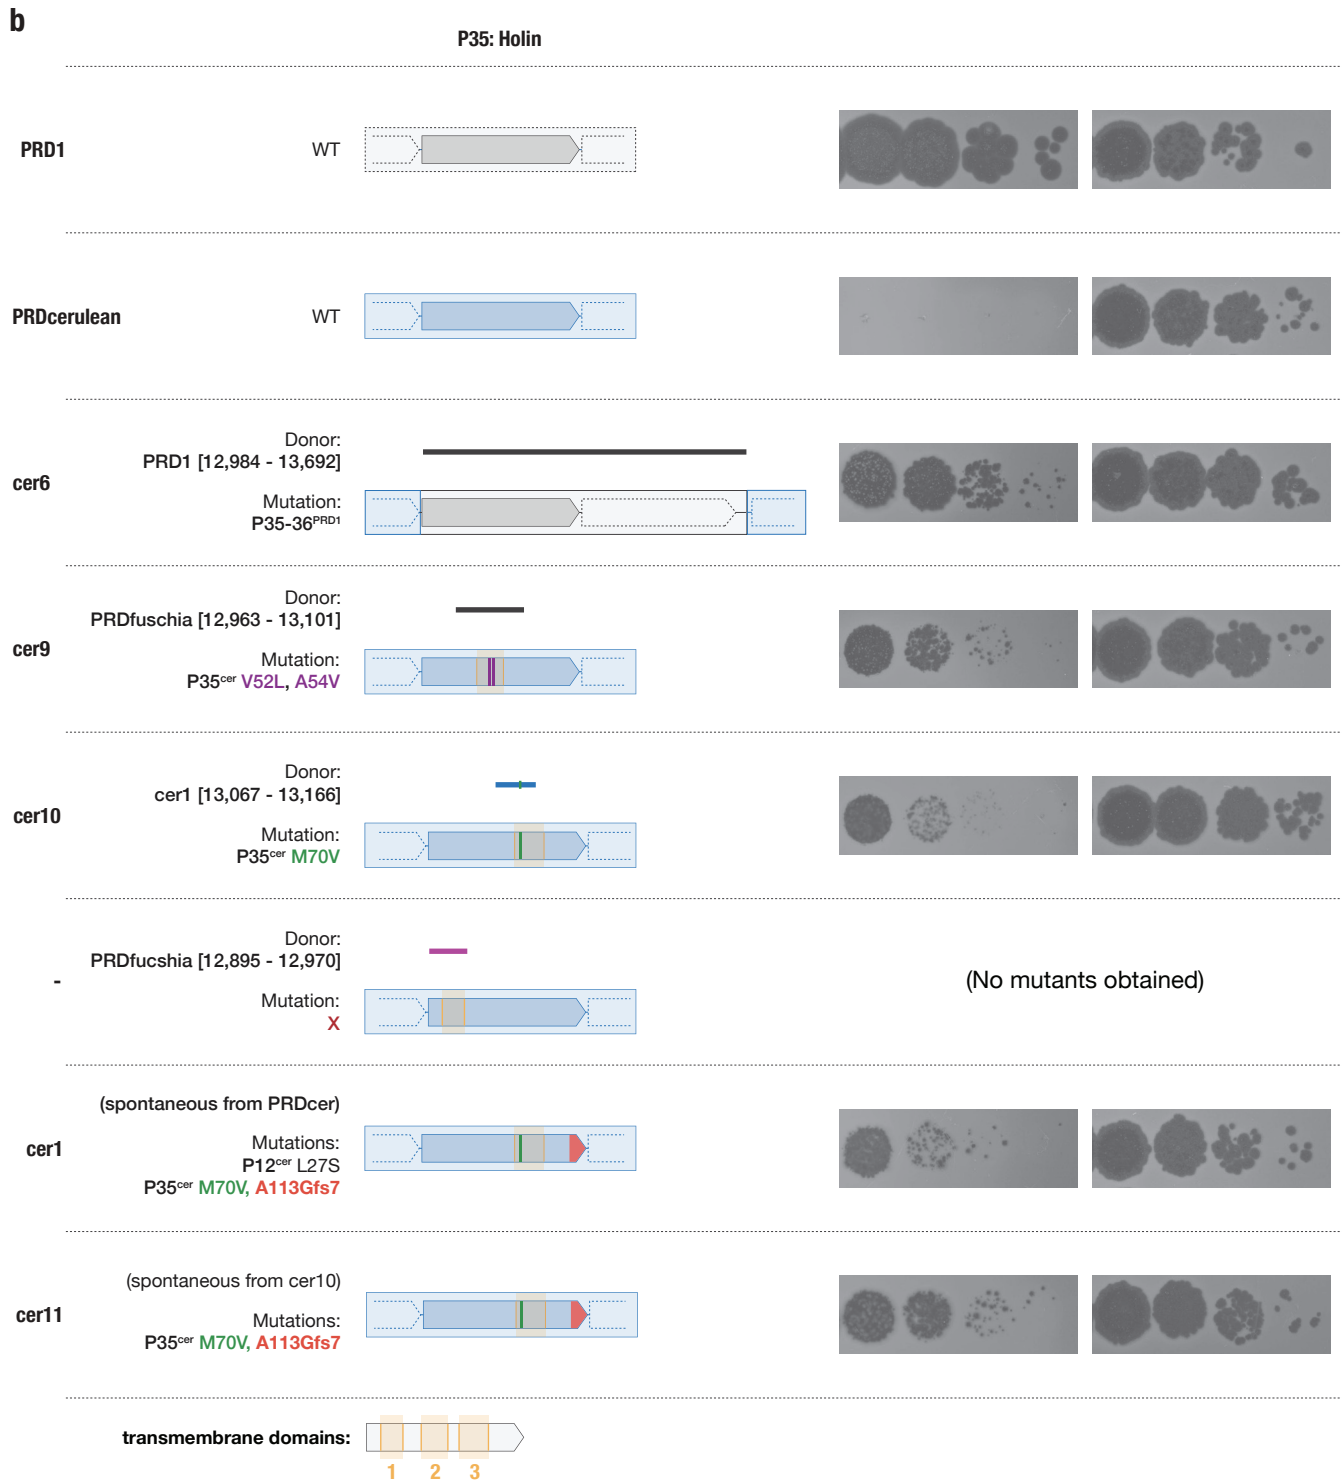

C

P35<sup>cer</sup> Holin

CCTOP predicted transmembrane domains

Alphafold predicted structure

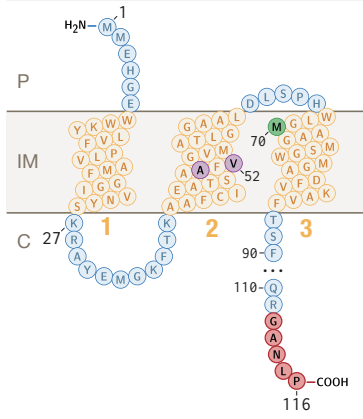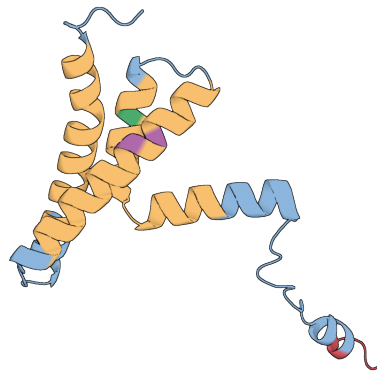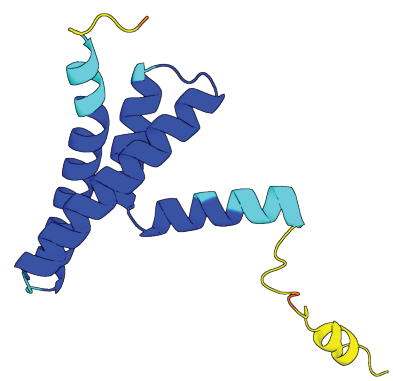

Regions of interest

- transmembrane domains
- M70V mutation
- V52L and A54V mutations
- A113G frameshift

Model confidence score

- Very high (pLDDT > 90)
- High (90 < pLDDT > 70)
- Low (70 > pLDDT > 50)
- Very low (pLDDT < 50)

d P35: Holin

|      | 1 | 5 | 10 | 15 | 20 | 25 | 30 | 35 | 40 | 45 | 50 | 55 | 60 | 65 | 70 | 75 | 80 | 85 | 90 | 95 | 100 | 105 | 110 | 117 |   |   |   |   |   |   |   |   |   |   |   |   |   |   |   |   |   |   |   |   |   |   |   |   |   |   |     |   |   |   |   |   |   |   |   |   |   |   |   |   |   |   |   |   |   |   |   |   |   |   |   |   |   |   |   |   |   |   |   |   |   |   |   |   |   |   |   |   |   |   |   |   |   |   |   |   |   |   |   |   |   |   |   |   |   |   |   |   |
|------|---|---|----|----|----|----|----|----|----|----|----|----|----|----|----|----|----|----|----|----|-----|-----|-----|-----|---|---|---|---|---|---|---|---|---|---|---|---|---|---|---|---|---|---|---|---|---|---|---|---|---|---|-----|---|---|---|---|---|---|---|---|---|---|---|---|---|---|---|---|---|---|---|---|---|---|---|---|---|---|---|---|---|---|---|---|---|---|---|---|---|---|---|---|---|---|---|---|---|---|---|---|---|---|---|---|---|---|---|---|---|---|---|---|---|
| oli  | M | E | N  | D  | E  | W  | K  | Y  | L  | I  | F  | P  | L  | V  | A  | T  | L  | G  | G  | I  | V   | N   | N   | S   | K | R | A | L | A | M | K | R | F | S | K | L | E | F | A | V | E | A | V | S | A | A | F | V | L | M | V   | T | L | G | G | A | A | M | D | L | S | P | H | W | L | G | M | A | A | G | M | S | G | W | M | G | A | D | F | V | K | A | V | F | S | Q | F | V | Q | S | K | I | G | P | I | N | H | P | G | P | I | D | S | N | D | K | P | G | R | T | F | N |
| cha  | M | E | N  | D  | E  | W  | K  | Y  | L  | I  | F  | P  | L  | V  | A  | T  | L  | G  | G  | I  | V   | N   | N   | S   | K | R | A | L | A | M | K | R | F | S | K | L | E | F | A | V | E | A | V | S | A | A | F | V | L | M | V   | T | L | G | G | A | A | M | D | L | S | P | H | W | L | G | M | A | A | G | M | S | G | W | M | G | A | D | F | V | K | A | V | F | S | Q | F | V | Q | S | K | I | G | P | I | N | H | P | G | P | I | D | S | N | D | K | P | G | R | T | F | N |
| plu  | M | E | N  | D  | E  | W  | K  | Y  | L  | I  | F  | P  | L  | V  | A  | T  | L  | G  | G  | I  | V   | N   | N   | S   | K | R | A | L | A | M | K | R | F | S | K | L | E | F | A | V | E | A | V | S | A | A | F | V | L | M | V   | T | L | G | G | A | A | M | D | L | S | P | H | W | L | G | M | A | A | G | M | S | G | W | M | G | A | D | F | V | K | A | V | F | S | Q | F | V | Q | S | K | I | G | P | I | N | H | P | G | P | I | D | S | N | D | K | P | G | R | T | F | N |
| tur  | M | E | N  | D  | E  | W  | K  | Y  | L  | I  | F  | P  | L  | V  | A  | T  | L  | G  | G  | I  | V   | N   | N   | S   | K | R | A | L | A | M | K | R | F | S | K | L | E | F | A | V | E | A | V | S | A | A | F | V | L | M | V   | T | L | G | G | A | A | M | D | L | S | P | H | W | L | G | M | A | A | G | M | S | G | W | M | G | A | D | F | V | K | A | V | F | S | Q | F | V | Q | S | K | I | G | P | I | N | H | P | G | P | I | D | S | N | D | K | P | G | R | T | F | N |
| can  | M | E | N  | D  | E  | W  | K  | Y  | L  | I  | F  | P  | L  | V  | A  | T  | L  | G  | G  | I  | V   | N   | N   | S   | K | R | A | L | A | M | K | R | F | S | K | L | E | F | A | V | E | A | V | S | A | A | F | V | L | M | V   | T | L | G | G | A | A | M | D | L | S | P | H | W | L | G | M | A | A | G | M | S | G | W | M | G | A | D | F | V | K | A | V | F | S | Q | F | V | Q | S | K | I | G | P | I | N | H | P | G | P | I | D | S | N | D | K | P | G | R | T | F | N |
| gra  | M | E | N  | D  | E  | W  | K  | Y  | L  | I  | F  | P  | L  | V  | A  | T  | L  | G  | G  | I  | V   | N   | N   | S   | K | R | A | L | A | M | K | R | F | S | K | L | E | F | A | V | E | A | V | S | A | A | F | V | L | M | V   | T | L | G | G | A | A | M | D | L | S | P | H | W | L | G | M | A | A | G | M | S | G | W | M | G | A | D | F | V | K | A | V | F | S | Q | F | V | Q | S | K | I | G | P | I | N | H | P | G | P | I | D | S | N | D | K | P | G | R | T | F | N |
| mah  | M | E | N  | D  | E  | W  | K  | Y  | L  | I  | F  | P  | L  | V  | A  | T  | L  | G  | G  | I  | V   | N   | N   | S   | K | R | A | L | A | M | K | R | F | S | K | L | E | F | A | V | E | A | V | S | A | A | F | V | L | M | V   | T | L | G | G | A | A | M | D | L | S | P | H | W | L | G | M | A | A | G | M | S | G | W | M | G | A | D | F | V | K | A | V | F | S | Q | F | V | Q | S | K | I | G | P | I | N | H | P | G | P | I | D | S | N | D | K | P | G | R | T | F | N |
| mam  | M | E | N  | D  | E  | W  | K  | Y  | L  | I  | F  | P  | L  | V  | A  | T  | L  | G  | G  | I  | V   | N   | N   | S   | K | R | A | L | A | M | K | R | F | S | K | L | E | F | A | V | E | A | V | S | A | A | F | V | L | M | V   | T | L | G | G | A | A | M | D | L | S | P | H | W | L | G | M | A | A | G | M | S | G | W | M | G | A | D | F | V | K | A | V | F | S | Q | F | V | Q | S | K | I | G | P | I | N | H | P | G | P | I | D | S | N | D | K | P | G | R | T | F | N |
| sku  | M | E | N  | D  | E  | W  | K  | Y  | L  | I  | F  | P  | L  | V  | A  | T  | L  | G  | G  | I  | V   | N   | N   | S   | K | R | A | L | A | M | K | R | F | S | K | L | E | F | A | V | E | A | V | S | A | A | F | V | L | M | V   | T | L | G | G | A | A | M | D | L | S | P | H | W | L | G | M | A | A | G | M | S | G | W | M | G | A | D | F | V | K | A | V | F | S | Q | F | V | Q | S | K | I | G | P | I | N | H | P | G | P | I | D | S | N | D | K | P | G | R | T | F | N |
| roy  | M | E | N  | D  | E  | W  | K  | Y  | L  | I  | F  | P  | L  | V  | A  | T  | L  | G  | G  | I  | V   | N   | N   | S   | K | R | A | L | A | M | K | R | F | S | K | L | E | F | A | V | E | A | V | S | A | A | F | V | L | M | V   | T | L | G | G | A | A | M | D | L | S | P | H | W | L | G | M | A | A | G | M | S | G | W | M | G | A | D | F | V | K | A | V | F | S | Q | F | V | Q | S | K | I | G | P | I | N | H | P | G | P | I | D | S | N | D | K | P | G | R | T | F | N |
| che  | M | E | N  | D  | E  | W  | K  | Y  | L  | I  | F  | P  | L  | V  | A  | T  | L  | G  | G  | I  | V   | N   | N   | S   | K | R | A | L | A | M | K | R | F | S | K | L | E | F | A | V | E | A | V | S | A | A | F | V | L | M | V   | T | L | G | G | A | A | M | D | L | S | P | H | W | L | G | M | A | A | G | M | S | G | W | M | G | A | D | F | V | K | A | V | F | S | Q | F | V | Q | S | K | I | G | P | I | N | H | P | G | P | I | D | S | N | D | K | P | G | R | T | F | N |
| PRD1 | M | E | N  | D  | E  | W  | K  | Y  | L  | I  | F  | P  | L  | V  | A  | T  | L  | G  | G  | I  | V   | N   | N   | S   | K | R | A | L | A | M | K | R | F | S | K | L | E | F | A | V | E | A | V | S | A | A | F | V | L | M | V   | T | L | G | G | A | A | M | D | L | S | P | H | W | L | G | M | A | A | G | M | S | G | W | M | G | A | D | F | V | K | A | V | F | S | Q | F | V | Q | S | K | I | G | P | I | N | H | P | G | P | I | D | S | N | D | K | P | G | R | T | F | N |
| rub  | M | E | N  | D  | E  | W  | K  | Y  | L  | I  | F  | P  | L  | V  | A  | T  | L  | G  | G  | I  | V   | N   | N   | S   | K | R | A | L | A | M | K | R | F | S | K | L | E | F | A | V | E | A | V | S | A | A | F | V | L | M | V   | T | L | G | G | A | A | M | D | L | S | P | H | W | L | G | M | A | A | G | M | S | G | W | M | G | A | D | F | V | K | A | V | F | S | Q | F | V | Q | S | K | I | G | P | I | N | H | P | G | P | I | D | S | N | D | K | P | G | R | T | F | N |
| jet  | M | E | N  | D  | E  | W  | K  | Y  | L  | I  | F  | P  | L  | V  | A  | T  | L  | G  | G  | I  | V   | N   | N   | S   | K | R | A | L | A | M | K | R | F | S | K | L | E | F | A | V | E | A | V | S | A | A | F | V | L | M | V   | T | L | G | G | A | A | M | D | L | S | P | H | W | L | G | M | A | A | G | M | S | G | W | M | G | A | D | F | V | K | A | V | F | S | Q | F | V | Q | S | K | I | G | P | I | N | H | P | G | P | I | D | S | N | D | K | P | G | R | T | F | N |
| min  | M | E | N  | D  | E  | W  | K  | Y  | L  | I  | F  | P  | L  | V  | A  | T  | L  | G  | G  | I  | V   | N   | N   | S   | K | R | A | L | A | M | K | R | F | S | K | L | E | F | A | V | E | A | V | S | A | A | F | V | L | M | V   | T | L | G | G | A | A | M | D | L | S | P | H | W | L | G | M | A | A | G | M | S | G | W | M | G | A | D | F | V | K | A | V | F | S | Q | F | V | Q | S | K | I | G | P | I | N | H | P | G | P | I | D | S | N | D | K | P | G | R | T | F | N |
| mus  | M | E | N  | D  | E  | W  | K  | Y  | L  | I  | F  | P  | L  | V  | A  | T  | L  | G  | G  | I  | V   | N   | N   | S   | K | R | A | L | A | M | K | R | F | S | K | L | E | F | A | V | E | A | V | S | A | A | F | V | L | M | V   | T | L | G | G | A | A | M | D | L | S | P | H | W | L | G | M | A | A | G | M | S | G | W | M | G | A | D | F | V | K | A | V | F | S | Q | F | V | Q | S | K | I | G | P | I | N | H | P | G | P | I | D | S | N | D | K | P | G | R | T | F | N |
| win  | M | E | N  | D  | E  | W  | K  | Y  | L  | I  | F  | P  | L  | V  | A  | T  | L  | G  | G  | I  | V   | N   | N   | S   | K | R | A | L | A | M | K | R | F | S | K | L | E | F | A | V | E | A | V | S | A | A | F | V | L | M | V   | T | L | G | G | A | A | M | D | L | S | P | H | W | L | G | M | A | A | G | M | S | G | W | M | G | A | D | F | V | K | A | V | F | S | Q | F | V | Q | S | K | I | G | P | I | N | H | P | G | P | I | D | S | N | D | K | P | G | R | T | F | N |
| nav  | M | E | N  | D  | E  | W  | K  | Y  | L  | I  | F  | P  | L  | V  | A  | T  | L  | G  | G  | I  | V   | N   | N   | S   | K | R | A | L | A | M | K | R | F | S | K | L | E | F | A | V | E | A | V | S | A | A | F | V | L | M | V   | T | L | G | G | A | A | M | D | L | S | P | H | W | L | G | M | A | A | G | M | S | G | W | M | G | A | D | F | V | K | A | V | F | S | Q | F | V | Q | S | K | I | G | P | I | N | H | P | G | P | I | D | S | N | D | K | P | G | R | T | F | N |
| cob  | M | E | N  | D  | E  | W  | K  | Y  | L  | I  | F  | P  | L  | V  | A  | T  | L  | G  | G  | I  | V   | N   | N   | S   | K | R | A | L | A | M | K | R | F | S | K | L | E | F | A | V | E | A | V | S | A | A | F | V | L | M | V   | T | L | G | G | A | A | M | D | L | S | P | H | W | L | G | M | A | A | G | M | S | G | W | M | G | A | D | F | V | K | A | V | F | S | Q | F | V | Q | S | K | I | G | P | I | N | H | P | G | P | I | D | S | N | D | K | P | G | R | T | F | N |
| sag  | M | E | N  | D  | E  | W  | K  | Y  | L  | I  | F  | P  | L  | V  | A  | T  | L  | G  | G  | I  | V   | N   | N   | S   | K | R | A | L | A | M | K | R | F | S | K | L | E | F | A | V | E | A | V | S | A | A | F | V | L | M | V</ |   |   |   |   |   |   |   |   |   |   |   |   |   |   |   |   |   |   |   |   |   |   |   |   |   |   |   |   |   |   |   |   |   |   |   |   |   |   |   |   |   |   |   |   |   |   |   |   |   |   |   |   |   |   |   |   |   |   |   |   |   |

## e P35: Holin mutants

|       |        |                      |             |                          |       |                       |                                 |
|-------|--------|----------------------|-------------|--------------------------|-------|-----------------------|---------------------------------|
| PRD1  | MMEHGE | WWKYLIFPLVATLGGIVNYS | KRALAMKRFSK | LEFAVEAVSAAFVGLMVTLGGAAM | DLSPH | WLGMAAGMSGWGMGADFKAVF | SQFVQSKIAPINQPGPIDSDNDKPG-RTFND |
| aqu   | MMEHGE | WWKYLIFPLVAMFGGIVNYS | KRAYEMGKFSK | VAFCEIATSAAFVGLMVTLGGAAL | DLSPH | WLGMAAGMSGWGMGADFKAVF | TSFVKSIGPIESGQSIENDNDQRG-RTFHD  |
| fuc   | MMEHGE | WWKYLIFPLIATLGGIVNYS | KRALAMKRFSK | LEFAVEAVSAAFVGLMVTLGGAAM | DLSPH | WLGMAAGMSGWGMGADFKAVF | TSFVKSIGPIESGQSIENDNDQRG-ANLP-  |
| cer   | MMEHGE | WWKYLIFPLVAMFGGIVNYS | KRAYEMGKFTK | AAFCIEATSAAFVGVMTLGGAAL  | DLSPH | WLGMAAGMSGWGMGADFKAVF | TSFVKSIGPIESGQSIENDNDQRG-ANLP-  |
| cer6  | MMEHGE | WWKYLIFPLVATLGGIVNYS | KRALAMKRFSK | LEFAVEAVSAAFVGLMVTLGGAAM | DLSPH | WLGMAAGMSGWGMGADFKAVF | SQFVQSKIAPINQPGPIDSDNDKPG-RTFND |
| cer9  | MMEHGE | WWKYLIFPLVAMFGGIVNYS | KRAYEMGKFTK | AAFCIEATSAAFVGLMVTLGGAAL | DLSPH | WLGMAAGMSGWGMGADFKAVF | TSFVKSIGPIESGQSIENDNDQRG-ANLP-  |
| cer10 | MMEHGE | WWKYLIFPLVAMFGGIVNYS | KRAYEMGKFTK | AAFCIEATSAAFVGLMVTLGGAAL | DLSPH | WLGMAAGMSGWGMGADFKAVF | TSFVKSIGPIESGQSIENDNDQRG-ANLP-  |
| cer11 | MMEHGE | WWKYLIFPLVAMFGGIVNYS | KRAYEMGKFTK | AAFCIEATSAAFVGVMTLGGAAL  | DLSPH | WLGMAAGMSGWGMGADFKAVF | TSFVKSIGPIESGQSIENDNDQRG-RTFHD  |

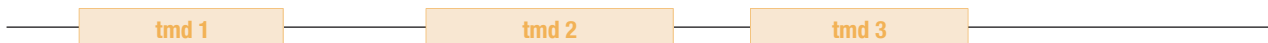

**Figure S5 | Mutations in the holin protein confer expanded host range in PRDcerulean** **a**, Adsorption efficiency of PRD1 and PRDcerulean on *S. enterica* and *S. enterica* - pKJK5 (*S. enterica*<sup>P</sup>). Percentage of unadsorbed phage on *S. enterica* with no plasmid is shown as a negative adsorption control. There is no difference in adsorption between PRD1 and PRDcerulean (n=3) on the plasmid-bearing host. **b**, Detail of holin (P35) mutants and their effect in plaque formation. (Iconography as described in Fig. 5) Donor sequence used as recombination substrate for each of the phages is shown as a line above each mutant gene depiction, and the origin and precise coordinates of all the recombination substrates is given to the left. Recombination with TMD1 did not result in recombinant phages able to plaque on *S. enterica*<sup>P</sup> but recombinants of TMD2 & TMD3 did. **c**, To the left, a diagram of the predicted membrane topology of the holin protein (P35<sup>cer</sup>). It is predicted to have a short N-terminal periplasmic segment, 3 transmembrane domains (TMDs), and a longer disordered C-terminal region that extends into the cytoplasm. P = periplasm, IM = inner membrane and C = cytoplasm. Residues mutated in (b) are colored as indicated in the key. To the right, the AlphaFold predicted structure of P35<sup>cer</sup>. The structure is colored firstly by relevant region as previous, and secondly by model confidence score (pLDDT, a confidence score based on the local distance difference test), showing very high and high confidence in the membrane embedded section of the structure. This conformation suggests that the TMD2 and TMD3 mutations may be spatially proximal in the native protein structure. **d**, Holin protein multiple sequence alignment. Each row corresponds to a different isolate of our alphatectivirus collection (using abbreviated names). Vertical spaces have been added to highlight the location of the transmembrane domains, annotated at the bottom of the alignment. Asterisks mark the locations of the mutations of interest. **e**, Amino acid sequence of the holin mutants, columns in grey highlight non-conserved amino acid positions. PRDfuscia (fuc) and PRDcerulean (cer) share a distinct C-terminal end motif, but they differ in TMD1&2. Replacement of the full holin sequence (from PRD1 into PRDcerulean) and specific mutations in TMD2 and TMD3 in cer9 and cer10, respectively, recover the lysis phenotype. Finally, cer11, a large plaque mutant of cer10, reverts the C-terminal motif to the longer version, similar to that one of PRDaquamarine (aqu) and others, as shown in (d).
