# Supplementary material for: Official Documents- Disbursement Letter for GEF Grant TF013706
Source: Springer Nature journal article supplement (doi:10.1038/s41467-024-47416-z), 2013-01-29
Supplement: 41467_2024_47416_MOESM3_ESM.pdf [file 41467_2024_47416_MOESM3_ESM.pdf]

## **Description of Additional Supplementary Files:**

**Supplementary Dataset 1:** Spreadsheet listing all bacterial strains, plasmids, phages, and primers and environmental samples used in this study.

**Supplementary Dataset 2:** Spreadsheet listing all phage genomes used for comparative genomics analyses (tequiviruses, fiersviruses, inoviruses, FtMidnight-relatives), and SRA datasets for metagenomic analyses.

**Supplementary Dataset 3:** Spreadsheet listing CRISPR-Cas and RM hits in bacterial hosts.
