# Supplementary material for: Official Documents- Disbursement Letter for GEF Grant TF013706
Source: Springer Nature journal article supplement (doi:10.1038/s41467-024-47416-z), 2013-01-29
Supplement: 41467_2024_47416_MOESM7_ESM.pdf [file 41467_2024_47416_MOESM7_ESM.pdf]

## Reporting Summary

Nature Portfolio wishes to improve the reproducibility of the work that we publish. This form provides structure for consistency and transparency in reporting. For further information on Nature Portfolio policies, see our [Editorial Policies](#) and the [Editorial Policy Checklist](#).

### Statistics

For all statistical analyses, confirm that the following items are present in the figure legend, table legend, main text, or Methods section.

n/a Confirmed

- The exact sample size ( $n$ ) for each experimental group/condition, given as a discrete number and unit of measurement
- A statement on whether measurements were taken from distinct samples or whether the same sample was measured repeatedly
- The statistical test(s) used AND whether they are one- or two-sided  
*Only common tests should be described solely by name; describe more complex techniques in the Methods section.*
- A description of all covariates tested
- A description of any assumptions or corrections, such as tests of normality and adjustment for multiple comparisons
- A full description of the statistical parameters including central tendency (e.g. means) or other basic estimates (e.g. regression coefficient) AND variation (e.g. standard deviation) or associated estimates of uncertainty (e.g. confidence intervals)
- For null hypothesis testing, the test statistic (e.g.  $F$ ,  $t$ ,  $r$ ) with confidence intervals, effect sizes, degrees of freedom and  $P$  value noted  
*Give  $P$  values as exact values whenever suitable.*
- For Bayesian analysis, information on the choice of priors and Markov chain Monte Carlo settings
- For hierarchical and complex designs, identification of the appropriate level for tests and full reporting of outcomes
- Estimates of effect sizes (e.g. Cohen's  $d$ , Pearson's  $r$ ), indicating how they were calculated

*Our web collection on [statistics for biologists](#) contains articles on many of the points above.*

### Software and code

Policy information about [availability of computer code](#)

Data collection

Custom code used has been made publicly available on github as indicated in the manuscript [https://github.com/baymlab/2023\\_QuinonesOlvera-Owen](https://github.com/baymlab/2023_QuinonesOlvera-Owen)  
Software used for data collection:  
scikit-image v0.17.2

Data analysis

Custom code used has been made publicly available on github as indicated in the manuscript [https://github.com/baymlab/2023\\_QuinonesOlvera-Owen](https://github.com/baymlab/2023_QuinonesOlvera-Owen)  
Software used for data analysis:  
prokka v1.14.6  
clinker v1.0  
HHpred via MPI Bioinformatics Toolkit  
tblastn  
CRISPRCasTyper v1.8.0  
DefenseFinder v1.0.9  
HMMER v3.3.1  
Kraken2 v2..1.2  
samtools v1.6  
IGV v2.11.4  
iqtree v2.2.0.3  
iqtree v2.2.0.3

iTOL v6.7  
 phymml v3.2.0  
 FigTree v1.4.4  
 Trimmomatic v0.39  
 Rasusa v0.5.0  
 Unicycler v0.4.8  
 rnaviralSPADES v.3.15.5  
 RATT v.1.0.3  
 minimap2 v2.24  
 bcftools v.1.9  
 samtools v1.6  
 vcftools 0.1.16  
 seaborn v0.12.2  
 matplotlib v1.0  
 Protter v1.0  
 CCTOP v1.1.0  
 ColabFold v1.5.3  
 Pymol v2.5.6  
 clustalo v1.2.4  
 UGENE v38.1

For manuscripts utilizing custom algorithms or software that are central to the research but not yet described in published literature, software must be made available to editors and reviewers. We strongly encourage code deposition in a community repository (e.g. GitHub). See the Nature Portfolio [guidelines for submitting code & software](#) for further information.

## Data

Policy information about [availability of data](#)

All manuscripts must include a [data availability statement](#). This statement should provide the following information, where applicable:

- Accession codes, unique identifiers, or web links for publicly available datasets
- A description of any restrictions on data availability
- For clinical datasets or third party data, please ensure that the statement adheres to our [policy](#)

Raw sequencing reads have been deposited in the NCBI BioProject database under accession number PRJNA954020.

Genome accession numbers used: in this work:

KJ802832.1  
 PP430153.1  
 NC\_001421.2  
 V00604.2  
 V00642.1  
 AY099114.1  
 PP412815.1  
 PP412816.1  
 PP412817.1  
 PP412818.1  
 PP412819.1  
 PP412820.1  
 PP412821.1  
 PP412822.1  
 PP412823.1  
 PP412824.1  
 PP412825.1  
 PP412826.1  
 PP412827.1  
 PP412828.1  
 PP412829.1  
 PP412830.1  
 PP412831.1  
 PP412832.1  
 PP412833.1  
 PP412834.1  
 PP412835.1  
 PP412836.1  
 PP412837.1  
 PP412838.1  
 PP412839.1  
 PP412840.1  
 PP412841.1  
 PP412842.1

PP412843.1  
PP412844.1  
PP412845.1  
PP412846.1  
PP412847.1  
PP412848.1  
PP412849.1  
PP412850.1  
PP412851.1  
PP412852.1  
PP412853.1  
PP412854.1  
PP412855.1  
PP412856.1  
PP412857.1  
PP412858.1  
PP412859.1  
PP412860.1  
PP412861.1  
PP412862.1  
PP412863.1  
PP412864.1  
PP412865.1  
PP430139.1  
PP430142.1  
PP430140.1  
PP430143.1  
PP430144.1  
PP430141.1  
PP430145.1  
PP430147.1  
PP430148.1  
PP430149.1  
PP430150.1  
PP430151.1  
PP430152.1  
PP430146.1

SRA run accessions:

SRR24145760  
SRR24145729  
SRR24145730  
SRR24145754  
SRR24145732  
SRR24145735  
SRR24145731  
SRR24145768  
SRR24145770  
SRR24145753  
SRR24145761  
SRR24145708  
SRR24145752  
SRR24145755  
SRR24145734  
SRR24145747  
SRR24145771  
SRR24145746  
SRR24145744  
SRR24145767  
SRR24145727  
SRR24145757  
SRR24145709  
SRR24145762  
SRR24145769  
SRR24145749  
SRR24145756  
SRR24145726  
SRR24145764

SRR24145707  
 SRR24145738  
 SRR24145733  
 SRR24145750  
 SRR24145745  
 SRR24145742  
 SRR24145736  
 SRR24145766  
 SRR24145741  
 SRR24145739  
 SRR24145737  
 SRR24145716  
 SRR24145758  
 SRR24145763  
 SRR24145743  
 SRR24145725  
 SRR24145728  
 SRR24145740  
 SRR24145765  
 SRR24145759  
 SRR24145751  
 SRR24145748  
 SRR28247442  
 SRR28247440  
 SRR28247441  
 SRR28247439  
 SRR28247444  
 SRR28247438  
 SRR28247443  
 SRR24145712  
 SRR24145713  
 SRR24145714  
 SRR24145715  
 SRR24145717  
 SRR24145711  
 SRR28248334

## Research involving human participants, their data, or biological material

Policy information about studies with [human participants or human data](#). See also policy information about [sex, gender \(identity/presentation\), and sexual orientation](#) and [race, ethnicity and racism](#).

|                                                                    |     |
|--------------------------------------------------------------------|-----|
| Reporting on sex and gender                                        | N/A |
| Reporting on race, ethnicity, or other socially relevant groupings | N/A |
| Population characteristics                                         | N/A |
| Recruitment                                                        | N/A |
| Ethics oversight                                                   | N/A |

Note that full information on the approval of the study protocol must also be provided in the manuscript.

## Field-specific reporting

Please select the one below that is the best fit for your research. If you are not sure, read the appropriate sections before making your selection.

Life sciences  Behavioural & social sciences  Ecological, evolutionary & environmental sciences

For a reference copy of the document with all sections, see [nature.com/documents/nr-reporting-summary-flat.pdf](https://www.nature.com/documents/nr-reporting-summary-flat.pdf)

## Life sciences study design

All studies must disclose on these points even when the disclosure is negative.

|                 |                                                                                                                                                                                                                                                           |
|-----------------|-----------------------------------------------------------------------------------------------------------------------------------------------------------------------------------------------------------------------------------------------------------|
| Sample size     | Sample sizes were limited by availability, e.g. only two independent sources of wastewater were routinely available to us. Where we had control over sample sizes, data was always collected from 3 or more independent samples to maximize data accuracy |
| Data exclusions | No data were excluded from the analyses                                                                                                                                                                                                                   |
| Replication     | Data were collected in replicate to maximize reproducibility. Number of replicates was often limited by technical constraint but where averages were used replicate number was always >3                                                                  |
| Randomization   | Randomization was not applicable in this study as the data we collected was not susceptible to selection bias                                                                                                                                             |
| Blinding        | Blinding was not applicable in this study as the data we collected was not susceptible to observer bias                                                                                                                                                   |

## Reporting for specific materials, systems and methods

We require information from authors about some types of materials, experimental systems and methods used in many studies. Here, indicate whether each material, system or method listed is relevant to your study. If you are not sure if a list item applies to your research, read the appropriate section before selecting a response.

### Materials & experimental systems

| n/a                                 | Involvement in the study                               |
|-------------------------------------|--------------------------------------------------------|
| <input checked="" type="checkbox"/> | <input type="checkbox"/> Antibodies                    |
| <input checked="" type="checkbox"/> | <input type="checkbox"/> Eukaryotic cell lines         |
| <input checked="" type="checkbox"/> | <input type="checkbox"/> Palaeontology and archaeology |
| <input checked="" type="checkbox"/> | <input type="checkbox"/> Animals and other organisms   |
| <input checked="" type="checkbox"/> | <input type="checkbox"/> Clinical data                 |
| <input checked="" type="checkbox"/> | <input type="checkbox"/> Dual use research of concern  |
| <input checked="" type="checkbox"/> | <input type="checkbox"/> Plants                        |

### Methods

| n/a                                 | Involvement in the study                        |
|-------------------------------------|-------------------------------------------------|
| <input checked="" type="checkbox"/> | <input type="checkbox"/> ChIP-seq               |
| <input checked="" type="checkbox"/> | <input type="checkbox"/> Flow cytometry         |
| <input checked="" type="checkbox"/> | <input type="checkbox"/> MRI-based neuroimaging |
